# Supplementary material for: Autophagy induces hair follicle stem cell activation and hair follicle regeneration by regulating glycolysis
Source: PubMed Central journal article supplement (PMC10770887; doi:10.1186/s13578-023-01177-2), 2024-01-05

A

Control

3-MA

Rapa

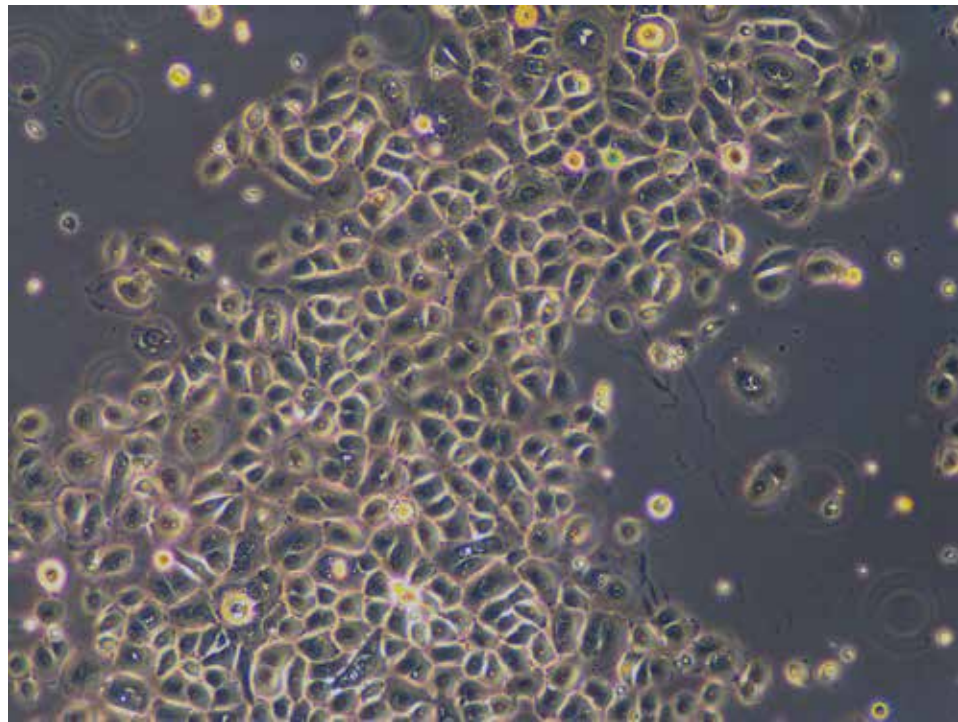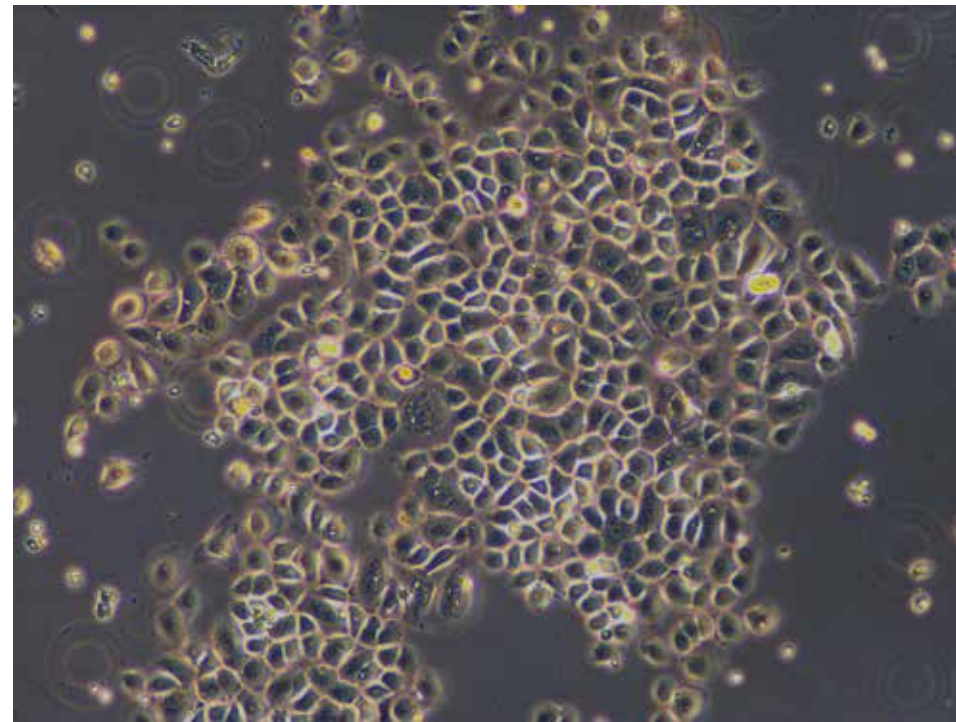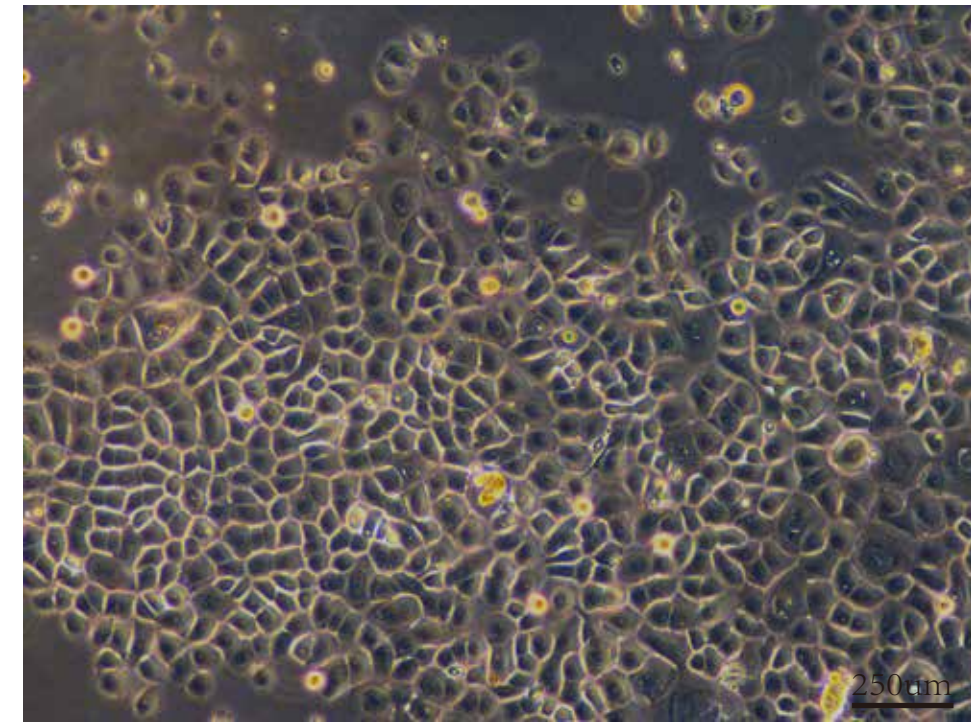

B

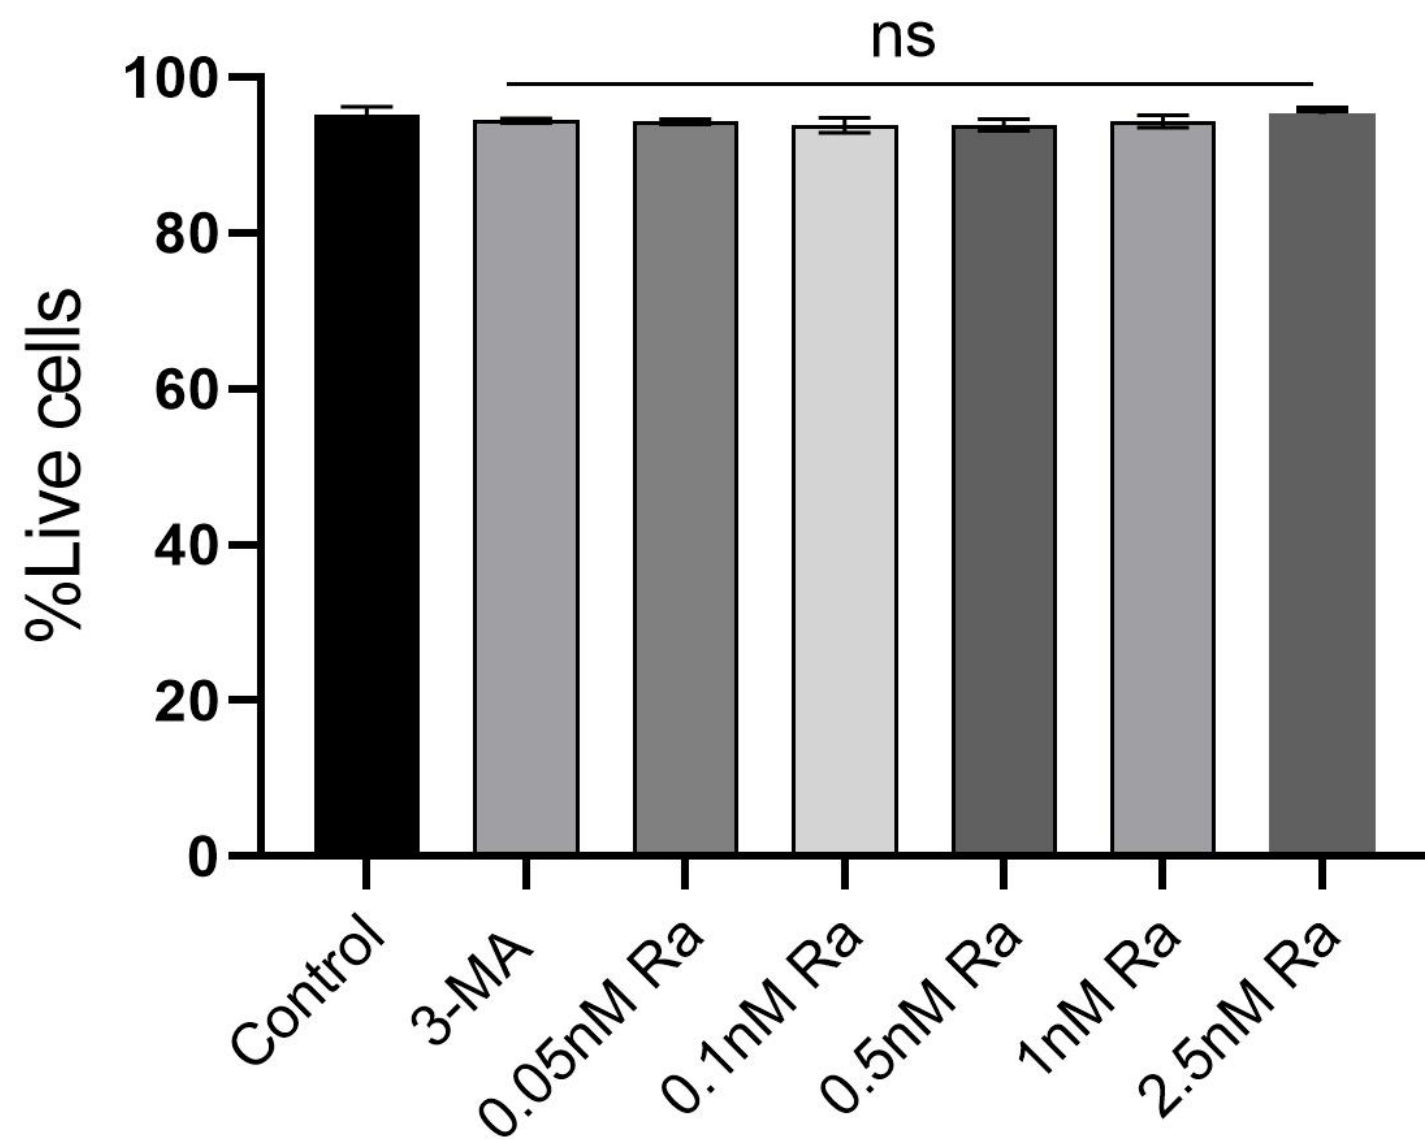

C

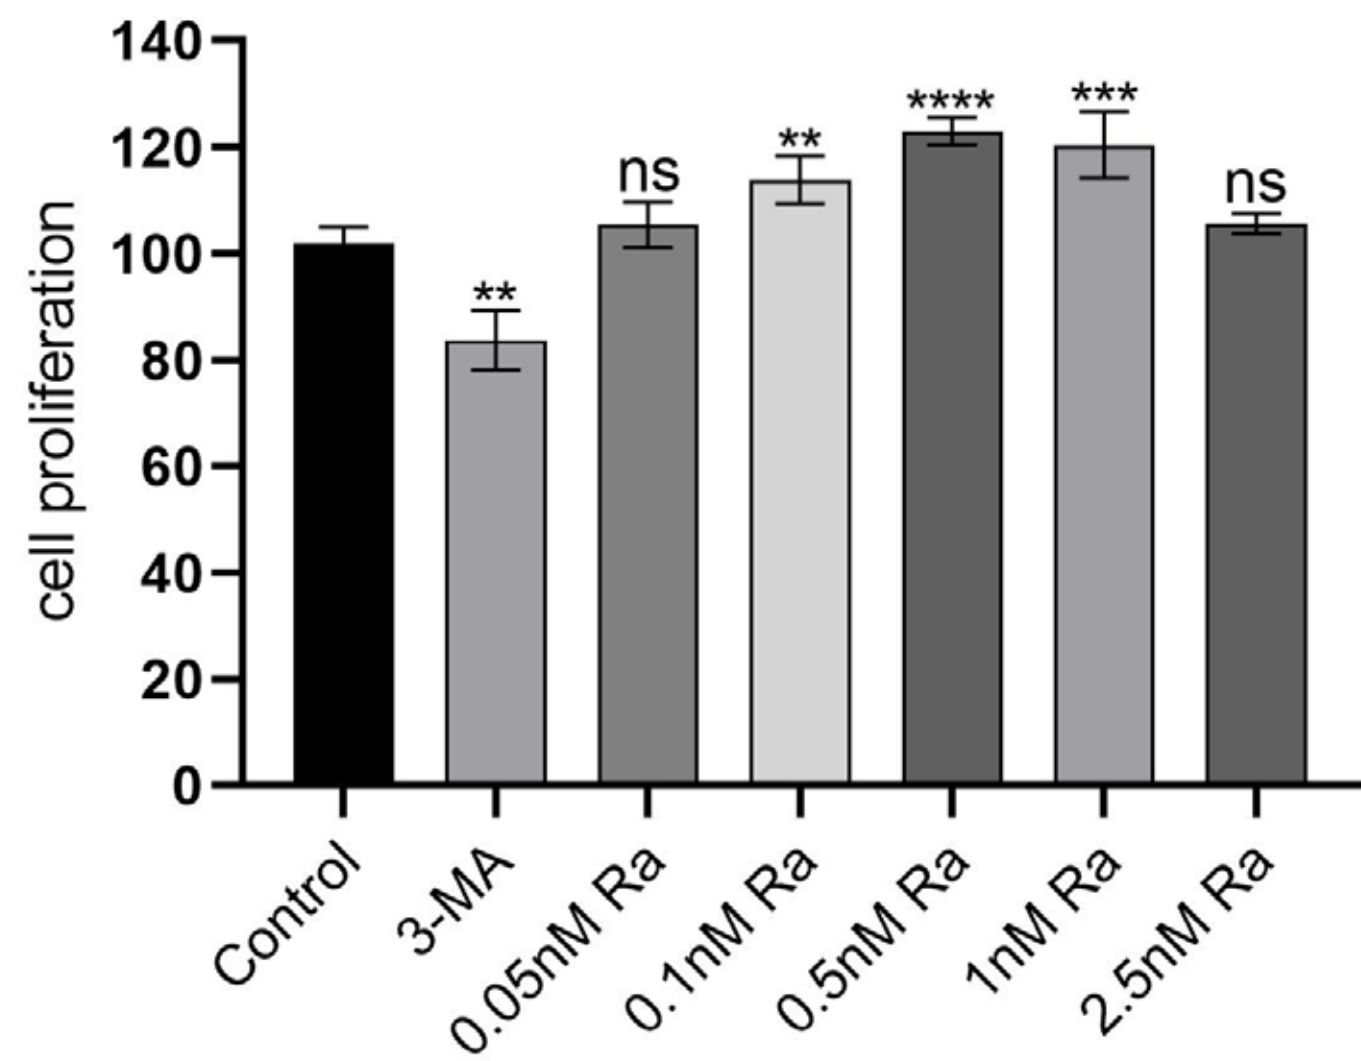

Supplement: 13578_2023_1177_MOESM5_ESM.pdf [file 13578_2023_1177_MOESM5_ESM.pdf]
